# Supplementary material for: Long-term correction of ornithine transcarbamylase deficiency in Spf-Ash mice with a translationally optimized AAV vector
Source: PubMed Central journal article supplement — Mol Ther Methods Clin Dev. 2020 Nov 17;20:169–80. doi: 10.1016/j.omtm.2020.11.005 (PMC7786024; doi:10.1016/j.omtm.2020.11.005), 2020-11-17
Supplement: mmc1.pdf [file mmc1.pdf]

## **Supplemental Information**

### **Long-term correction of ornithine transcarbamylase deficiency in Spf-Ash mice with a translationally optimized AAV vector**

**Giulia De Sabbata, Florence Boisgerault, Corrado Guarnaccia, Alessandra Iaconcig, Giulia Bortolussi, Fanny Collaud, Giuseppe Ronzitti, Marcelo Simon Sola, Patrice Vidal, Jeremy Rouillon, Severine Charles, Emanuele Nicastro, Lorenzo D'Antiga, Petr Ilyinskii, Federico Mingozzi, Takashi Kei Kishimoto, and Andrés F. Muro**

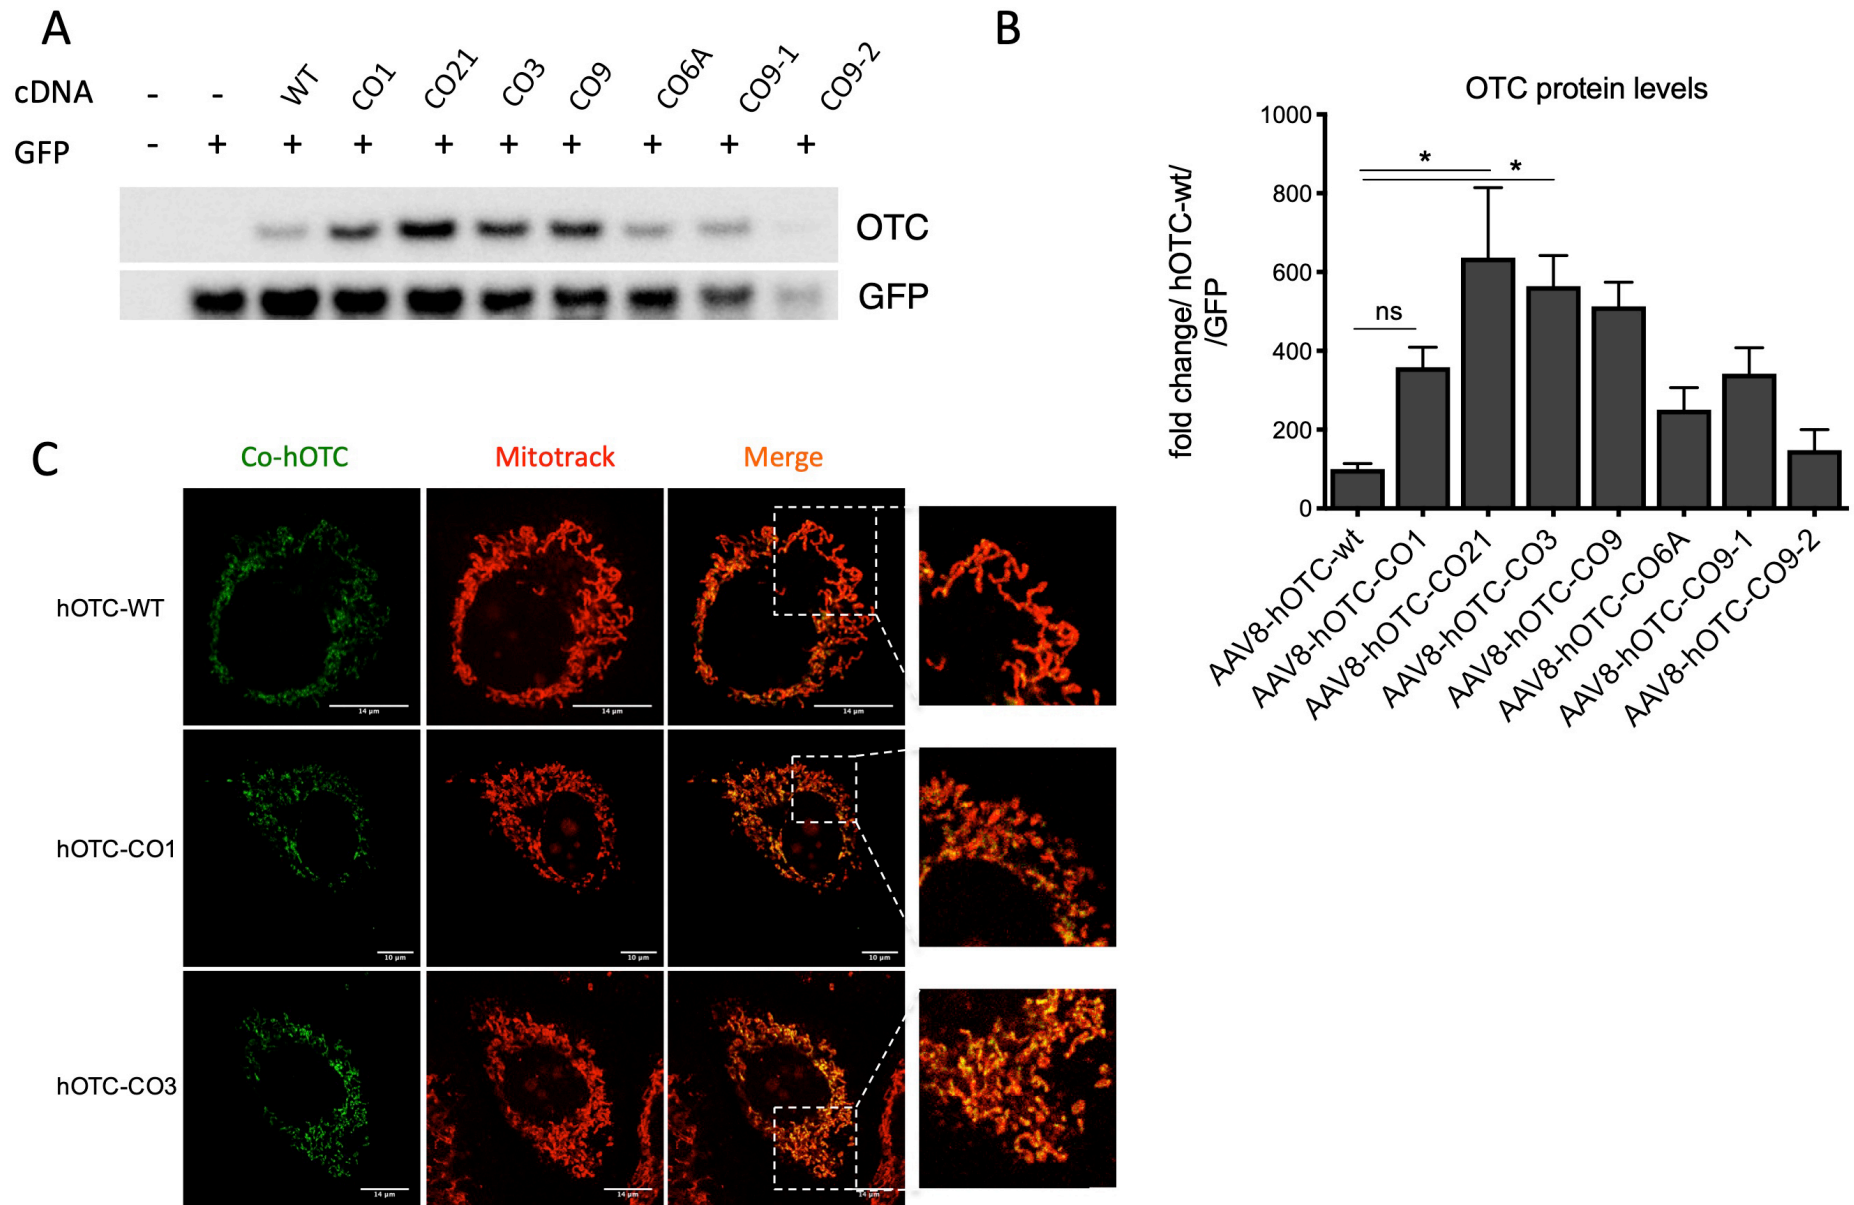

**Figure S1. Codon-optimized hOTC variants tested in Huh-7 human liver cells.** **A)** Representative Western blot analysis of OTC protein levels in cell lysates (15  $\mu$ g protein per lane) following co-transfection of pSMD2-hOTC-CO constructs and GFP plasmid. The control lane contains cell lysate from non-transfected cells, while the empty lane contains lysate from cells transfected with empty AAV8 plasmid (pSMD2) together with GFP plasmid. **B)** Densitometric quantification of OTC protein from the experiment shown in Panel A. GFP was used as transfection control. Values are expressed as fold-change respect to the AAV8-hOTC-wt. Data are shown as mean  $\pm$  SEM and statistical analyses was performed by one-way ANOVA with Turkey's Multiple comparison test ( $n=2$ , \* $P < 0,05$ ). **C)** Sub-cellular localization studies of hOTC in Huh-7 human liver cells. Huh-7 cells were transfected with plasmids encoding the indicated hOTC-CO variants. Mitochondria (red, MITO-TRACK) and hOTC (green) were detected with a confocal microscope. On the right, a magnified picture of the indicated areas is shown. The scale bar corresponds to 14  $\mu$ m.

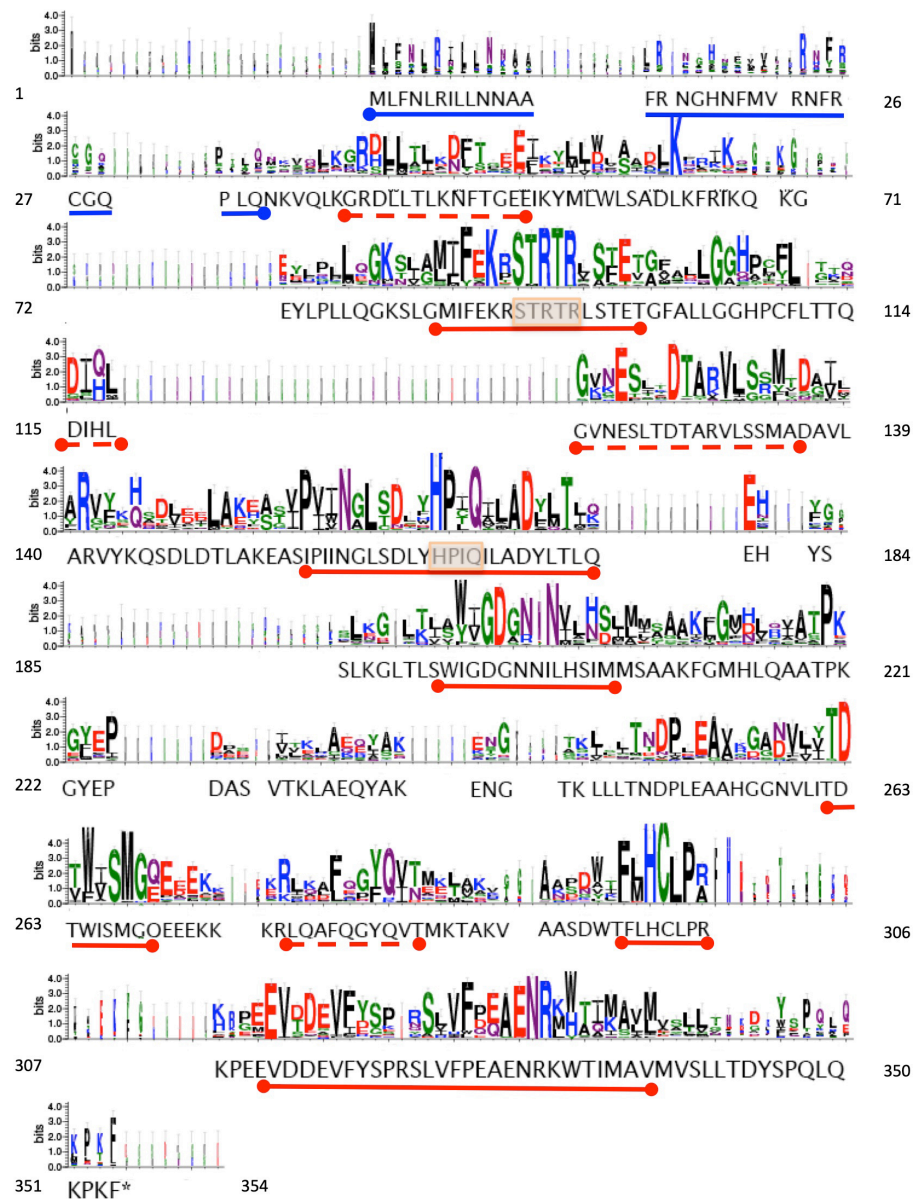

**Figure S2. Logo representation of the alignment of 142 OTCases.** The size of the letters indicates the degree of sequence conservation and most of these have catalytically or structurally important roles. The human full-length OTC primary sequence is shown below the logo. The signal peptide and mitochondrial localization sequence are indicated by a blue line below the human sequence. Very conserved regions are indicated by a red continuous line, while the dashed line indicate conserved regions. The active sites are indicated by an orange rectangle (90-94 and 160-171: Ornithine and carbamoyl phosphate binding site, respectively). The numbers at the side (from 1 to 354) correspond to the human OTC amino acid sequence. Gaps in the human sequence are caused by insertions in the OTC cDNAs in the different species, resulting in different-length sequences. Table S1 contains the list of species used in the representation.

5'

ATGCTGTTCAACCTGCGAATCCTGCTGAACAACGCCGCTTTTCGGAACGGGCACAAC  
TTTATGGTGAGGAAC TTTCGCTGCGGACAGCCCCTCCAGAATAAGGTCCAGCTGAAG  
GGCAGGGACCTGCTGACCCTGAAAAATTTACAGGGGAGGAAATCAAATACATGCTG  
TGGCTGAGCGCCGATCTGAAGTTCAGAATCAAGCAGAAGGGCGAGTACCTGCCTCTG  
CTCCAGGGCAAAGCCTGGGGATGATCTTCGAAAAGCGCAGTACTCGGACCAGACTG  
TCAACCGAGACTGGCTTCGCTCTGCTGGGAGGCCACCCTTGCTTCCTGACAACCCAG  
GACATTCACCTGGGAGTGAACGAGTCCCTGACCGACACTGCTCGCGTCCTGAGCTCT  
ATGGCCGACGCCGTGCTGGCTCGGGTGTACAAACAGTCCGACCTGGATAACCCTGGCC  
AAGGAAGCTTCCATCCCCATCATCAACGGCCTGAGCGACCTGTACCACCCCATCCAG  
ATCCTGGCCGACTACCTGACCCTGCAGGAGCACTACAGCAGCCTGAAGGGCCTGACC  
CTGAGCTGGATCGGCGACGGCAACAATATCCTGCACTCTATTATGATGTCTGCCGCC  
AAGTTTGGAATGCACCTGCAGGCTGCTACCCCTAAAGGCTACGAACCCGATGCCTCT  
GTGACAAAGCTGGCTGAACAGTACGCCAAAGAGAACGGCACAAGCTGCTGCTGACC  
AACGACCCTCTGGAGGCCGCTCACGGAGGCAACGTGCTGATCACCGATACCTGGATT  
AGTATGGGACAGGAGGAAGAGAAGAAGCGGCTGCAGGCCTTCCAGGGCTACCAG  
GTCACCATGAAAACCGCTAAGGTGGCCGCCAGCGATTGGACCTTCTGCACTGCCTG  
CCCAGAAAGCCCGAAGAGGTGGACGACGAGGTCTTCTACTCTCCAGAAAGCCTGGTG  
TTTCCCGAAGCTGAGAATAGGAAGTGGACAATTATGGCAGTGATGGTGTCCCTGCTG  
ACTGATTATTCTCCTCAACTGCAGAAACCTAAATTTTGA

3'

**Figure S3.** Nucleotide sequence of the codon optimized hOTC CO21 ORF. The 5' and 3' orientation of the sequence are indicated.



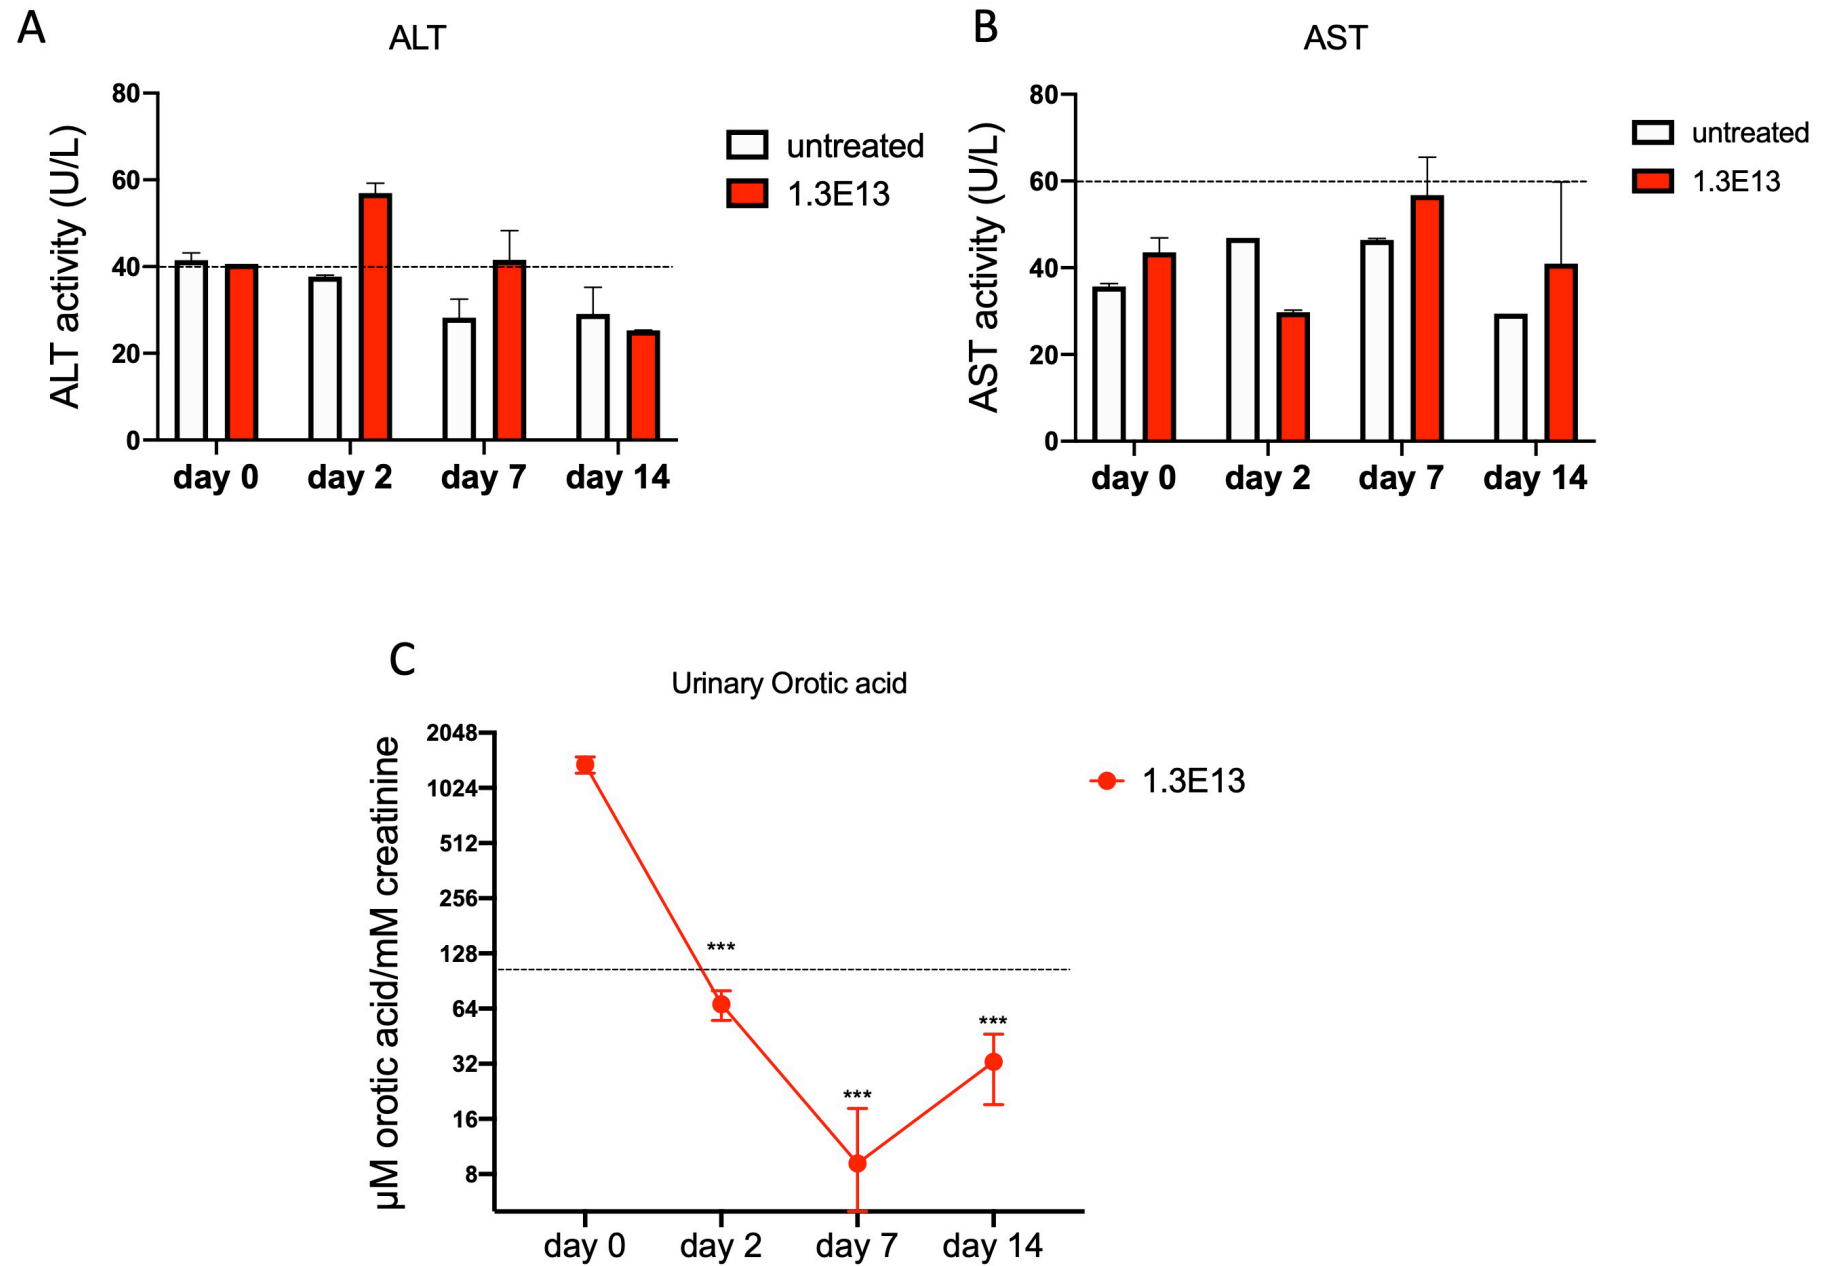

**Figure S5. High dose treatment. Analysis of liver transaminases in plasma.** Juvenile P30 OTC<sup>SpfAsh</sup> mice were i.v. injected with 1.3E13 vg/kg of the or AAV8-hOTC-CO21Δice were i.v. inj2). Blood samples were taken at 2, 7 and 14 days after vector administration. AST **(A)**, ALT **(B)** liver transaminases, and urinary orotic acid **(C)** were determined. Data are shown as mean ± SEM and statistical analyses was performed by two-way ANOVA with mixed effect analysis for Panels A and B, and with one-way ANOVA with Bonferroni's multiple comparison test (\*\*\*)P <0,0001).

Table S1. List of 142 species from which the ornithine transcarbamylase (ornithine carbamoyltransferase, OTCase) primary sequence were obtained. These sequences were then aligned to generate the logo representation of Figure S2.

| Entry       | Entry name        | Status     | Protein names                                                                                    | Gene names                  | Organism                                                                                                                 | Length |
|-------------|-------------------|------------|--------------------------------------------------------------------------------------------------|-----------------------------|--------------------------------------------------------------------------------------------------------------------------|--------|
| P18186      | OTC_BACSU         | reviewed   | Ornithine carbamoyltransferase [OTCase] (EC 2.1.3.3)                                             | argF BSU11250               | Bacillus subtilis (strain 168)                                                                                           | 319    |
| O19072      | OTC_PIG           | reviewed   | Ornithine carbamoyltransferase, mitochondrial (EC 2.1.3.3) [OrnithineOTC]                        | argF NMBH4476_0658 NMH_2186 | Sus scrofa (Pig)                                                                                                         | 328    |
| Q05M07      | OTC_BORAP         | reviewed   | Ornithine carbamoyltransferase [OTCase] (EC 2.1.3.3)                                             | arcB BAPK0_0897 BaPKo_0870  | Borrelia afzelii (strain PK0)                                                                                            | 328    |
| EGN013      | OTC_NEIMH         | reviewed   | Ornithine carbamoyltransferase [OTCase] (EC 2.1.3.3)                                             | argF NMBH4476_0658 NMH_2186 | Neisseria meningitidis serogroup B / serotype 15 (strain H44/76)                                                         | 331    |
| P11803      | OTC_EMENI         | reviewed   | Ornithine carbamoyltransferase, mitochondrial (EC 2.1.3.3) [OrnithineargB AN4409]                | argB AN4409                 | Microascus nidulans (strain FGSC A4 / ATCC 38163 / CBS 112.46 / NRRL 194 / M139) (Aspergillus nidulans)                  | 359    |
| OT55601     | OTC_OTCSE         | reviewed   | Ornithine carbamoyltransferase, catabolic [OTCase] (EC 2.1.3.3)                                  | arcB SA2434                 | Staphylococcus aureus (strain Mu50) / ATCC 700699                                                                        | 359    |
| P31317      | OTC_SCHPO         | reviewed   | Ornithine carbamoyltransferase, mitochondrial (EC 2.1.3.3) [OrnithineargS3 SPAC4G5.10]           | argS3 SPAC4G5.10            | Schizosaccharomyces pombe (strain 972 / ATCC 24843) (Fission yeast)                                                      | 327    |
| P11066      | OTC_ASPNG         | reviewed   | Ornithine carbamoyltransferase, mitochondrial (EC 2.1.3.3) [OrnithineargB]                       | argB                        | Aspergillus niger                                                                                                        | 370    |
| B1KX03      | OTC_CLOMB         | reviewed   | Ornithine carbamoyltransferase [OTCase] (EC 2.1.3.3)                                             | arcB CLK_1978               | Clostridium botulinum (strain Loch Maree / Type A3)                                                                      | 333    |
| P11725      | OTC_MOUSE         | reviewed   | Ornithine carbamoyltransferase, mitochondrial (EC 2.1.3.3) [OrnithineOtc]                        | OTC                         | Mus musculus (Mouse)                                                                                                     | 354    |
| P0CL21      | OTC_COCIM         | reviewed   | Ornithine carbamoyltransferase, mitochondrial (EC 2.1.3.3) [OrnithineCMG_04084]                  | CMG_04084                   | Coccidioides immitis (strain RS) (Valley fever fungus)                                                                   | 349    |
| P31226      | OTC_LITCT         | reviewed   | Ornithine carbamoyltransferase, mitochondrial (EC 2.1.3.3) [Ornithine transcarbamylase] [OTCase] | OTC                         | Lithobates catesbeianus (American bullfrog) (Rana catesbeiana)                                                           | 350    |
| Q8CWM2      | OTC2_STAES        | reviewed   | Ornithine carbamoyltransferase 2, catabolic [OTCase 2] (EC 2.1.3.3)                              | arcB2 SE_2216               | Staphylococcus epidermidis (strain ATCC 12228)                                                                           | 335    |
| Q9YH19      | OTC_CHICK         | reviewed   | Ornithine carbamoyltransferase, mitochondrial (EC 2.1.3.3) [OrnithineOTC]                        | OTC                         | Gallus gallus (Chicken)                                                                                                  | 354    |
| O50039      | OTC_ARATH         | reviewed   | Ornithine carbamoyltransferase, chloroplastic (EC 2.1.3.3) [Ornithine OTC]                       | OTC                         | Arabidopsis thaliana (Mouse-ear cress)                                                                                   | 375    |
| A6Q668      | OTC_STAAE         | reviewed   | Ornithine carbamoyltransferase [OTCase] (EC 2.1.3.3)                                             | argF NWMN_1078              | Staphylococcus aureus (strain Newman)                                                                                    | 333    |
| Q1JF21      | OTC_STRDP         | reviewed   | Ornithine carbamoyltransferase [OTCase] (EC 2.1.3.3)                                             | arcB MGAS10270_Spy1288      | Streptococcus pyogenes serotype M2 (strain MGAS10270)                                                                    | 337    |
| Q8G598      | OTC2_LACHI        | reviewed   | Ornithine carbamoyltransferase, catabolic [OTCase] (EC 2.1.3.3)                                  | arcB                        | Lactobacillus hilgardii                                                                                                  | 343    |
| Q04391      | OTC_ECOLU         | reviewed   | Ornithine carbamoyltransferase subunit I [OTCase-1] (EC 2.1.3.3)                                 | argI b4254 JW4211           | Escherichia coli (strain K12)                                                                                            | 334    |
| Q3J4K5      | OTC_RHOSA         | reviewed   | Ornithine carbamoyltransferase [OTCase] (EC 2.1.3.3)                                             | argF RHOSA_05910 RSP_2009   | Rhodobacter sphaeroides (strain ATCC 17023 / 2.4.1 / NCIB 8253 / DSM 158)                                                | 308    |
| Q8ET05      | OTC_OCEIH         | reviewed   | Ornithine carbamoyltransferase [OTCase] (EC 2.1.3.3)                                             | argF OB0460                 | Oceanobacillus ihayensis (strain DSM 14371 / CIP 107618 / JCM 11309 / KCTC 3954 / HT8831)                                | 322    |
| Q8C4U1      | OTC1_STAES        | reviewed   | Ornithine carbamoyltransferase 1, catabolic [OTCase 1] (EC 2.1.3.3)                              | arcB1 SE_0103               | Staphylococcus epidermidis (strain ATCC 12228)                                                                           | 332    |
| P14995      | OTC_PACTA         | reviewed   | Ornithine carbamoyltransferase, mitochondrial (EC 2.1.3.3) [OrnithineOTC]                        | OTC                         | Pachysolen tannophilus (Yeast)                                                                                           | 347    |
| OT55603     | OTC_OTCSE         | reviewed   | Ornithine carbamoyltransferase 1, catabolic [OTCase 1] (EC 2.1.3.3)                              | arcB1 gbs2085               | Streptococcus agalactiae serotype III (strain NEM316)                                                                    | 325    |
| P00481      | OTC_RAT           | reviewed   | Ornithine carbamoyltransferase, mitochondrial (EC 2.1.3.3) [OrnithineOtc]                        | OTC                         | Rattus norvegicus (Rat)                                                                                                  | 354    |
| P65605      | OTC2_STRA3        | reviewed   | Ornithine carbamoyltransferase 2, catabolic [OTCase 2] (EC 2.1.3.3)                              | arcB2 gbs2124               | Streptococcus agalactiae serotype III (strain NEM316)                                                                    | 337    |
| R8A010      | OTC_SHEEP         | reviewed   | Ornithine carbamoyltransferase, mitochondrial (EC 2.1.3.3) [OrnithineOTC]                        | OTC                         | Ovis aries (Sheep)                                                                                                       | 355    |
| BSXMC1      | OTC_STR2P         | reviewed   | Ornithine carbamoyltransferase [OTCase] (EC 2.1.3.3)                                             | arcB Spy49_1195C            | Streptococcus pyogenes serotype M49 (strain NZ131)                                                                       | 337    |
| Q48296      | OTC_HALS5         | reviewed   | Ornithine carbamoyltransferase, catabolic [cOTCase] (EC 2.1.3.3)                                 | argF VNG_6315G              | Halobacterium salinarum (strain ATCC 700922 / JCM 11081 / NRC-1) (Halobacterium halobium)                                | 295    |
| OT5C2P2     | OTC_OTCSE         | reviewed   | Ornithine carbamoyltransferase 1, catabolic [OTCase 1] (EC 2.1.3.3)                              | arcB1 SAG2216               | Streptococcus agalactiae serotype V (strain ATCC BAA-611 / 2603 V/R)                                                     | 335    |
| Q9PNU6      | OTCA_CAMIE        | reviewed   | Ornithine carbamoyltransferase, anabolic [OTCase] (EC 2.1.3.3)                                   | argF G09942                 | Campylobacter jejuni subsp. jejuni serotype O:2 (strain ATCC 700819 / NCTC 11168)                                        | 306    |
| Q43814      | OTC_PEA           | reviewed   | Ornithine carbamoyltransferase, chloroplastic (EC 2.1.3.3) [Ornithine IARGF]                     | IARGF                       | Pisum sativum (Garden pea)                                                                                               | 375    |
| Q20247      | OTC1A_PESH5       | reviewed   | Ornithine carbamoyltransferase 1, anabolic [OTCase 1] (EC 2.1.3.3) [OArgF]                       | OTC                         | Pseudomonas savastanoi pv. phaseolicola (Pseudomonas syringae pv. phaseolicola)                                          | 306    |
| AAUV03      | OTC_STR5Y         | reviewed   | Ornithine carbamoyltransferase [OTCase] (EC 2.1.3.3)                                             | arcB SSUO5_0626             | Streptococcus suis (strain 05ZVH33)                                                                                      | 337    |
| P00480      | OTC_HUMAN         | reviewed   | Ornithine carbamoyltransferase, mitochondrial (EC 2.1.3.3) [OrnithineOTC]                        | OTC                         | Homo sapiens (Human)                                                                                                     | 354    |
| OT55604     | OTC_OTCSE         | reviewed   | Ornithine carbamoyltransferase 1, catabolic [OTCase 1] (EC 2.1.3.3)                              | arcB1 SAG2216               | Streptococcus agalactiae serotype V (strain ATCC BAA-611 / 2603 V/R)                                                     | 335    |
| Q9N1U7      | OTC_BOVIN         | reviewed   | Ornithine carbamoyltransferase, mitochondrial (EC 2.1.3.3) [OrnithineOTC]                        | OTC                         | Bos taurus (Bovine)                                                                                                      | 354    |
| Q2YPH2      | OTC_BRAU2         | reviewed   | Ornithine carbamoyltransferase [OTCase] (EC 2.1.3.3)                                             | argB BAB1_0332              | Bruella abortus (strain 2308)                                                                                            | 312    |
| Q972M1      | OTC_SACS2         | reviewed   | Ornithine carbamoyltransferase [OTCase] (EC 2.1.3.3)                                             | argF SS00871                | Saccharolobus solfataricus (strain ATCC 35092 / DSM 1617 / JCM 11322 / F2) [Sulfolobus solfataricus]                     | 307    |
| P44770      | OTC_HAEIN         | reviewed   | Ornithine carbamoyltransferase, catabolic [OTCase] (EC 2.1.3.3)                                  | OTC                         | Haemophilus influenzae (strain ATCC 51907 / DSM 11121 / KW20 / Rd)                                                       | 334    |
| P68746      | OTC2_PSEF5        | reviewed   | Ornithine carbamoyltransferase 2, phenol/oxalin-insensitive [OTCase argK]                        | argK                        | Pseudomonas syringae pv. actinidiae                                                                                      | 327    |
| OT57805     | OTC_TKRAH         | reviewed   | Ornithine carbamoyltransferase, mitochondrial (EC 2.1.3.3) [Ornithine transcarbamylase] [OTCase] | OTC                         | Trametes hirsuta (White-rot fungus) (Coriolus hirsutus)                                                                  | 375    |
| P68747      | OTC2A_PESH5       | reviewed   | Ornithine carbamoyltransferase 2, anabolic [OTCase 2] (EC 2.1.3.3) [OArgF]                       | OTC                         | Pseudomonas savastanoi pv. phaseolicola (Pseudomonas syringae pv. phaseolicola)                                          | 327    |
| Q1J4R4      | OTC_STRPP         | reviewed   | Ornithine carbamoyltransferase [OTCase] (EC 2.1.3.3)                                             | arcB MGAS2096_Spy1292       | Streptococcus pyogenes serotype M12 (strain MGAS2096)                                                                    | 337    |
| P09690      | OTC2_ECOLU        | reviewed   | Ornithine carbamoyltransferase subunit F [OTCase-2] (EC 2.1.3.3)                                 | argF b0273 JW0266           | Escherichia coli (strain K12)                                                                                            | 334    |
| P65606      | OTC2_STRA5        | reviewed   | Ornithine carbamoyltransferase 2, catabolic [OTCase 2] (EC 2.1.3.3)                              | arcB2 SAG2165               | Streptococcus agalactiae serotype V (strain ATCC BAA-611 / 2603 V/R)                                                     | 337    |
| PC2CF3      | OTC_ASPFN         | reviewed   | Ornithine carbamoyltransferase, mitochondrial (EC 2.1.3.3) [OrnithineargI arg-1 AT6G_05492]      | arg-1 AT6G_05492            | Aspergillus terreus (strain NIH 2624 / FGSC A1156)                                                                       | 361    |
| P11724      | OTC_PSEAE         | reviewed   | Ornithine carbamoyltransferase, anabolic [OTCase] (EC 2.1.3.3)                                   | argF AR3537                 | Arthropis sinensis (Chinese alligator)                                                                                   | 305    |
| Q51742      | OTC_PYRFO         | reviewed   | Ornithine carbamoyltransferase, anabolic [OTCase] (EC 2.1.3.3)                                   | argF P0504                  | Pyrococcus furiosus (strain ATCC 43587 / DSM 3638 / JCM 8422 / Vc1)                                                      | 315    |
| AA24L2X5J4  | AA02L2X5J4_9BACT  | unreviewed | Ornithine carbamoyltransferase [OTCase] (EC 2.1.3.3)                                             | OTC                         | Candidatus Gastranaerophilus sp. (ex Termes propinquus)                                                                  | 310    |
| DBLH5       | DBLH5_ECTS1       | unreviewed | Ornithine transcarbamylase (EC 2.1.3.3)                                                          | OTC                         | Ectocarpus siliculosus (Brown alga) (Conferva siliculosa)                                                                | 320    |
| AA367YH05   | AA0367YH05_9ASCO  | unreviewed | Ornithine carbamoyltransferase, mitochondrial                                                    | OTC                         | Candida viswanathii                                                                                                      | 343    |
| AA04X1J355  | AA04X1J355_PIG    | unreviewed | Ornithine carbamoyltransferase, mitochondrial                                                    | OTC                         | Sus scrofa (Pig)                                                                                                         | 354    |
| AA024LQ222  | AA024LQ222_TURTR  | unreviewed | Ornithine carbamoyltransferase, mitochondrial                                                    | OTC                         | Tursiops truncatus (Atlantic bottlenose dolphin) (Delphinus truncatus)                                                   | 354    |
| AA0340WR1A1 | AA0340WR1A1_LIPVE | unreviewed | Ornithine carbamoyltransferase, mitochondrial                                                    | OTC                         | Lipotes vexillifer (Yangtze river dolphin)                                                                               | 354    |
| AA02Y9FRK9  | AA02Y9FRK9_PHYMC  | unreviewed | Ornithine carbamoyltransferase, mitochondrial                                                    | OTC                         | Physeter macrocephalus (Sperm whale) (Physeter catodon)                                                                  | 354    |
| AA02Y9GIU7  | AA02Y9GIU7_NEOSC  | unreviewed | Ornithine carbamoyltransferase, mitochondrial                                                    | OTC                         | Neomonachus schauinslandi (Hawaiian monk seal) (Monachus schauinslandi)                                                  | 354    |
| AA01428FN0  | AA01428FN0_9GAMM  | unreviewed | Ornithine carbamoyltransferase [OTCase] (EC 2.1.3.3)                                             | OTC                         | Endozoichomonas montiporae CL-33                                                                                         | 338    |
| AA0284SF3F  | AA0284SF3F_STYPI  | unreviewed | Ornithine carbamoyltransferase, mitochondrial                                                    | OTC                         | Slyophilora pistillata (Smooth cauliflower coral)                                                                        | 376    |
| AA01179S18  | AA01179S18_ALLSI  | unreviewed | Ornithine carbamoyltransferase, mitochondrial                                                    | OTC                         | Trachymys sinensis (Chinese slider turtle)                                                                               | 354    |
| Q9IAU8      | Q9IAU8_TRASE      | unreviewed | Ornithine transcarbamylase                                                                       | OTC                         | Trachymys scripta elegans (Red-eared slider turtle)                                                                      | 354    |
| WSUIC6      | WSUIC6_ICTPU      | unreviewed | Ornithine carbamoyltransferase, mitochondrial                                                    | OTC                         | Ictalurus punctatus (Channel catfish) (Silurus punctatus)                                                                | 352    |
| AA01Y2FGM4  | AA01Y2FGM4_PROLT  | unreviewed | Ornithine carbamoyltransferase [OTCase] (EC 2.1.3.3)                                             | OTC                         | Protomyces lactucaedebilis                                                                                               | 353    |
| AA021ZFB17  | AA021ZFB17_9EURO  | unreviewed | Ornithine carbamoyltransferase [OTCase] (EC 2.1.3.3)                                             | OTC                         | Aspergillus candidus                                                                                                     | 365    |
| M9ME20      | M9ME20_PSEAF      | unreviewed | Ornithine carbamoyltransferase [OTCase] (EC 2.1.3.3)                                             | OTC                         | Pseudozyma acetivorans (strain T-34) (Yeast) (Candida antarctica)                                                        | 382    |
| AA024JUSV56 | AA024JUSV56_LFEVW | unreviewed | Ornithine carbamoyltransferase, mitochondrial                                                    | OTC                         | Trachymys sinensis (Chinese slider turtle)                                                                               | 354    |
| AA03Q7SV11  | AA03Q7SV11_VUIUV  | unreviewed | Ornithine carbamoyltransferase, mitochondrial                                                    | OTC                         | Vulpes vulpes (red fox) (Canis vulpes)                                                                                   | 354    |
| H2VP80      | H2VP80_PONAB      | unreviewed | Ornithine carbamoyltransferase                                                                   | OTC                         | Pongo abelii (Sumatran orangutan) (Pongo pygmaeus abelii)                                                                | 354    |
| F1MNG5      | F1MNG5_BOVIN      | unreviewed | Ornithine carbamoyltransferase, mitochondrial                                                    | OTC                         | Bos taurus (Bovine)                                                                                                      | 354    |
| H2QV67      | H2QV67_PANTR      | unreviewed | Ornithine carbamoyltransferase                                                                   | OTC                         | Pan troglodytes (Chimpanzee)                                                                                             | 354    |
| AA0152Z6E8  | AA0152Z6E8_ERIEU  | unreviewed | Ornithine carbamoyltransferase, mitochondrial                                                    | OTC                         | Ermacrus europaeus (Western European hedgehog)                                                                           | 354    |
| AA02Y9M4V18 | AA02Y9M4V18_DELE1 | unreviewed | Ornithine carbamoyltransferase, mitochondrial                                                    | OTC                         | Delphinus phocaenoides (Beluga whale)                                                                                    | 354    |
| AA0480E1W6  | AA0480E1W6_PIG    | unreviewed | Ornithine carbamoyltransferase, mitochondrial                                                    | OTC                         | Sus scrofa (Pig)                                                                                                         | 354    |
| ISTWB5      | ISTWB5_ASP03      | unreviewed | Ornithine carbamoyltransferase [OTCase] (EC 2.1.3.3)                                             | A03042_05393                | Aspergillus oryzae (strain 3.042) (Yellow koji mold)                                                                     | 372    |
| AA01C7M8Y7  | AA01C7M8Y7_GRIFR  | unreviewed | Ornithine carbamoyltransferase, mitochondrial                                                    | OTC                         | Grifola frondosa (Maitake) (Polyporus frondosus)                                                                         | 342    |
| G3AUC8      | G3AUC8_SPAAP      | unreviewed | Ornithine carbamoyltransferase [OTCase] (EC 2.1.3.3)                                             | OTC                         | Spathospora passalidarum (strain NRRL Y-27907 / 11-Y1)                                                                   | 331    |
| AA024ZHN29  | AA024ZHN29_3HYPO  | unreviewed | Ornithine carbamoyltransferase [OTCase] (EC 2.1.3.3)                                             | OTC                         | Trichoderma parviseptum                                                                                                  | 353    |
| AA0112VQ21  | AA0112VQ21_9ASCO  | unreviewed | Ornithine carbamoyltransferase, mitochondrial                                                    | OTC                         | Aspergillus ruber (strain DSM 1968)                                                                                      | 354    |
| AA013TCN33  | AA013TCN33_3HYPO  | unreviewed | Ornithine carbamoyltransferase [OTCase] (EC 2.1.3.3)                                             | OTC                         | Trichoderma guizhouense                                                                                                  | 352    |
| AA028Y8289  | AA028Y8289_HUMAN  | unreviewed | Ornithine carbamoyltransferase, mitochondrial                                                    | OTC                         | Homo sapiens (Human)                                                                                                     | 130    |
| AA03L6FRW5  | AA03L6FRW5_MAZE   | unreviewed | Ornithine carbamoyltransferase, chloroplastic                                                    | OTC                         | Zea mays (Maize)                                                                                                         | 72     |
| AA02G9100   | AA02G9100_9LAMI   | unreviewed | Ornithine carbamoyltransferase [OTCase] (EC 2.1.3.3)                                             | OTC                         | Handroanthus impetiginosus                                                                                               | 261    |
| AA016H1D8   | AA016H1D8_NICAT   | unreviewed | Ornithine carbamoyltransferase, chloroplastic                                                    | OTC                         | Nicotiana attenuata (Coyote tobacco)                                                                                     | 376    |
| F8H550      | F8H550_STRES      | unreviewed | Ornithine carbamoyltransferase, catabolic [OTCase] (EC 2.1.3.3)                                  | OTC                         | Streptococcus salivarius (strain 57.1)                                                                                   | 354    |
| F1NUG7      | F1NUG7_CHICK      | unreviewed | Ornithine carbamoyltransferase, mitochondrial                                                    | OTC                         | Gallus gallus (Chicken)                                                                                                  | 354    |
| Q9IAV1      | Q9IAV1_9CHON      | unreviewed | Ornithine transcarbamylase                                                                       | OTC                         | Raja sp.                                                                                                                 | 353    |
| AA0178W4A4  | AA0178W4A4_ARATH  | unreviewed | OTC                                                                                              | AX17_At1g69770              | Arabidopsis thaliana (Mouse-ear cress)                                                                                   | 375    |
| F1RXQ9      | F1RXQ9_PIG        | unreviewed | Ornithine carbamoyltransferase, mitochondrial                                                    | OTC                         | Sus scrofa (Pig)                                                                                                         | 336    |
| AA0347N1C8  | AA0347N1C8_CALLUR | unreviewed | Ornithine carbamoyltransferase, mitochondrial                                                    | OTC                         | Callorhynchus (Northern fur seal)                                                                                        | 354    |
| AA0341D9D3  | AA0341D9D3_9EURO  | unreviewed | Ornithine carbamoyltransferase, mitochondrial                                                    | OTC                         | Neophocaena asiatorientalis asiatorientalis (Yangtze finless porpoise) (Neophocaena phocaenoides subsp. asiatorientalis) | 343    |
| AA02U3VW86  | AA02U3VW86_ODORO  | unreviewed | Ornithine carbamoyltransferase, mitochondrial                                                    | OTC                         | Odobenus rosmarus divergens (Pacific walrus)                                                                             | 354    |
| AA03Q7XZ17  | AA03Q7XZ17_URSAR  | unreviewed | Ornithine carbamoyltransferase, mitochondrial                                                    | OTC                         | Ursus arctos horribilis                                                                                                  | 354    |
| AA038329Y7  | AA038329Y7_BALAS  | unreviewed | Ornithine carbamoyltransferase, mitochondrial isoform X2                                         | OTC                         | Balaenoptera acutorostrata scammonii (North Pacific minke whale) (Balaenoptera davidsoni)                                | 299    |
| AA038329Y1  | AA038329Y1_BALAS  | unreviewed | Ornithine carbamoyltransferase, mitochondrial isoform X1                                         | OTC                         | Balaenoptera acutorostrata scammonii (North Pacific minke whale) (Balaenoptera davidsoni)                                | 354    |
| AA0384C5C2  | AA0384C5C2_URSMA  | unreviewed | Ornithine carbamoyltransferase, mitochondrial                                                    | OTC                         | Ursus martimus (Polar bear) (Thalictos martimus)                                                                         | 354    |
| Y8NCN3      | Y8NCN3_PHYMC      | unreviewed | Ornithine carbamoyltransferase, mitochondrial (Fragment)                                         | OTC                         | Ophiophagus hannah (King cobra) (Naja hannah)                                                                            | 354    |
| Q9IAV0      | Q9IAV0_SCUN       | unreviewed | Ornithine transcarbamylase                                                                       | OTC                         | Sceloporus undulatus (Eastern fence lizard) (Stellio undulatus)                                                          | 356    |
| AA01V4C89   | AA01V4C89_PATFA   | unreviewed | Ornithine carbamoyltransferase, mitochondrial                                                    | OTC                         | Patagonia fasciata monilis                                                                                               | 335    |
| Q9IAU7      | Q9IAU7_PYTRG      | unreviewed | Ornithine transcarbamylase (Fragment)                                                            | OTC                         | Python regius (Ball python) (Boa regia)                                                                                  | 163    |
| Q5K711      | Q5K711_CHICK      | unreviewed | Ornithine transcarbamylase (Fragment)                                                            | OTC                         | Gallus gallus (Chicken)                                                                                                  | 18     |
| Q95959      | Q95959_MYCSP      | unreviewed | Ornithine transcarbamylase [EC 2.1.3.3] (Fragment)                                               | OTC                         | Mycoplasma sp.                                                                                                           | 226    |
| Q8R1A8      | Q8R1A8_MOUSE      | unreviewed | Ornithine carbamoyltransferase, mitochondrial (Otc protein)                                      | OTC                         | Ch. (Mouse)                                                                                                              | 354    |
| AA03Q0D8F7  | AA03Q0D8F7_MESAU  | unreviewed | Ornithine carbamoyltransferase, mitochondrial                                                    | OTC                         | Mesocricetus auratus (Golden hamster)                                                                                    | 251    |
| AA03L7H3E8  | AA03L7H3E8_CRIGR  | unreviewed | OTC                                                                                              | CGPICR_014091               | Cricetus griseus (Chinese hamster) (Cricetus barabensis griseus)                                                         | 235    |
| Q5M897      | Q5M897_RAT        | unreviewed | Otc protein                                                                                      | OTC                         | Rattus norvegicus (Rat)                                                                                                  | 350    |
| AA0153G0L8  | AA0153G0L8_DIPOR  | unreviewed | Ornithine carbamoyltransferase, mitochondrial                                                    | OTC                         | Dipodomys ordii (Ord's kangaroo rat)                                                                                     | 355    |
| G58M029     | G58M029_HETGA     | unreviewed | Ornithine carbamoyltransferase, mitochondrial                                                    | OTC                         | Heteropogon glaber (Naked mole rat)                                                                                      | 354    |
| A1D528      | A1D528_LACBR      | unreviewed | Ornithine transcarbamylase (Fragment)                                                            | OTC                         | Lactobacillus buchneri                                                                                                   | 59     |
| BPV30       | BPV30_LACBR       | unreviewed | Ornithine transcarbamylase (Fragment)                                                            | OTC                         | Lactobacillus brevis                                                                                                     | 267    |
| A1D525      | A1D525_LACBR      | unreviewed | Ornithine transcarbamylase (Fragment)                                                            | OTC                         | Lactobacillus brevis                                                                                                     | 60     |
| A1D522      | A1D522_PEPDE      | unreviewed | Ornithine transcarbamylase (Fragment)                                                            | OTC                         | Pediococcus pentoseus                                                                                                    | 55     |
| AA075HZ36   |                   |            |                                                                                                  |                             |                                                                                                                          |        |
